# Supplementary material for: Occupational noise-induced hearing loss in China: a systematic review and meta-analysis
Source: PubMed Central journal article supplement — BMJ Open. 2020 Sep 28;10(9):e039576. doi: 10.1136/bmjopen-2020-039576 (PMC7523212; doi:10.1136/bmjopen-2020-039576), 2020-09-28
Supplement: bmjopen-2020-039576supp001.pdf [file bmjopen-2020-039576supp001.pdf]

## Supplementary material: More than two pages of tables in the article and a plethora of other tables

### Appendix

**Table 1** Prevalence of NIHL among workers in the transportation industry

| Author   | Type of transportation | Population |             |                           | Male (%) | Noise level (max) [dB(A)] | NIHL (%) |        |     |
|----------|------------------------|------------|-------------|---------------------------|----------|---------------------------|----------|--------|-----|
|          |                        | N          | Age (years) | Exposure duration (years) |          |                           | HFNIHL   | SFNIHL | NID |
| Hu[48]   | Air                    | 1498       | 29.7        | -                         | 73.0     | -                         | 6.1      | 4      | -   |
| Rong[49] | Railway                | 2045       | 39.9±6.8    | 18.0±11.0                 | 100.0    | 97.1                      | 13.1     | -      | 5.9 |
| Ge[50]   | Ship                   | 1000       | 20.0-60.0   | -                         | 100.0    | -                         | 15.6     | -      | -   |
| Xu[51]   | Ship                   | 53         | 17.0-42.0   | -                         | 100.0    | -                         | 60.4     | -      | -   |
| Peng[52] | Railway                | 1214       | 23.0-58.0   | 17.7±10.0                 | 100.0    | -                         | 10.3     | 5.8    | -   |
| Total    | -                      | 5810       | 17.0-60.0   | 17.9±10.6                 | 93.0     | 97.1                      | 11.6     | 5.6    | 5.9 |

dB(A), A-weighted decibels; NIHL, noise-induced hearing loss; HFNIHL, high-frequency noise-induced hearing

loss; SFNIHL, speech-frequency noise-induced hearing loss; NID, noise-induced deafness.

**Table 2** Prevalence of NIHL among workers in the mining industry

| Author    | Type of mining | Population |             |                           | Noise level (max) [dB(A)] | NIHL (%)   |        |        |      |
|-----------|----------------|------------|-------------|---------------------------|---------------------------|------------|--------|--------|------|
|           |                | N          | Age (years) | Exposure duration (years) |                           | Male (%)   | HFNIHL | SFNIHL | NID  |
| Zhang[53] | Mining         | 389        | 24-53       | -                         | 100.0                     | -          | 73.5   | 13.1   | -    |
| Yuan[54]  | Oil field      | 211        | 31.8±8.4    | 10.6±6.8                  | 100.0                     | 94.0       | 24.6   | 5.2    | -    |
| Zhao[55]  | Coal mining    | 1137       | 29.6±2.4    | 9.2±0.8                   | 100.0                     | 117.0      | 80.8   | -      | 10.1 |
| Zhang[56] | Mining         | 508        | 46.4±8.5    | 4.1±4.0                   | -                         | 107.5      | 40.3   | 3.1    | 10.6 |
| Total     | -              | 2245       | 34.4±9.3    | 8.0±4.0                   | 100.0                     | 106.2±11.6 | 65.1   | 7.0    | 10.3 |

dB(A), A-weighted decibels; NIHL, noise-induced hearing loss; HFNIHL, high-frequency noise-induced hearing

loss; SFNIHL, speech-frequency noise-induced hearing loss; NID, noise-induced deafness.

**Table 3** Prevalence of noise exposure and NIHL among manufacturing workers

| Author    | Type of factory     | Population |                |                                 |             | Noise level<br>(max or mean)<br>[dB(A)] | NIHL (%) |        |      |
|-----------|---------------------|------------|----------------|---------------------------------|-------------|-----------------------------------------|----------|--------|------|
|           |                     | N          | Age<br>(years) | Exposure<br>duration<br>(years) | Male<br>(%) |                                         | HFNIHL   | SFNIHL | NID  |
| Chen[57]  | Sports<br>equipment | 247        | 34.0±6.5       | -                               | 89.9        | -                                       | 17.0     | -      | 4.9  |
| Gao[58]   | Rolling mills       | 629        | 40.0±7.0       | 1-41                            | 83.5        | 118.0                                   | 25.6     | -      | 4.3  |
| Gao[59]   | -                   | 1023       | 17-55          | 5.1                             | 74.2        | 95.8                                    | 11.3     | 4.8    | -    |
| Gao[60]   | Toys                | 720        | 31.8±3.7       | -                               | 56.4        | -                                       | 10.4     | -      | -    |
| Jiao[61]  | -                   | 520        | 21-58          | 15.2                            | 60.8        | 101.5                                   | -        | -      | 12.8 |
| Li[62]    | Aviation            | 1197       | -              | 10.2±7.9                        | -           | 102.5                                   | 43.5     | -      | -    |
| Lin[63]   | -                   | 386        | 26.6±6.3       | 3.4±2.3                         | 79.5        | 89.9                                    | 74.1     | 50.5   | -    |
| Liu[64]   | Oxygen mills        | 333        | 20-59          | 14.0                            | 68.5        | 103.0                                   | 11.1     | 3.0    | -    |
| Lv[65]    | Airport             | 290        | 33.4±10.3      | 14.5±11.2                       | -           | 98.8                                    | 48.6     | 6.6    | -    |
| Wang[66]  | -                   | 512        | -              | -                               | -           | 91.6                                    | 81.3     | 21.3   | -    |
| Wang[67]  | Textile             | 1001       | 38.1±3.0       | 16.5±4.5                        | 18.7        | -                                       | 65.1     | 3.0    | -    |
| Yan[68]   | Tank                | 406        | 18-32          | -                               | 100.0       | -                                       | 34.5     | 23.2   | -    |
| Yan[69]   | -                   | 528        | -              | -                               | -           | 115.0                                   | 83.7     | 23.0   | -    |
| Guo[70]   | Textile             | 60         | 25.8±8.4       | 3.6±3.1                         | 16.7        | 100.5                                   | 28.3     | -      | -    |
| Nie[71]   | Shipbuilding        | 3260       | 40.4±8.8       | 7.7±3.8                         | 90.2        | 112.1                                   | 11.8     | 3.4    | -    |
| Wang[72]  | Textile             | 1156       | 30.7±5.6       | 11.9±5.3                        | -           | 93.7                                    | 33.3     | 17.3   | -    |
| Zhang[73] | Textile             | 481        | 18-58          | 1-33                            | 25.4        | 98.4                                    | 11.9     | -      | -    |
| Ni[74]    | Textile             | 618        | 35.8±6.1       | 10.6±7.6                        | -           | 113.5                                   | 23.6     | 0.8    | -    |
| Xie[75]   | Steel               | 98         | 37.0           | -                               | 84.7        | 134.5                                   | 61.2     | 17.3   | -    |
| Chen[76]  | Automotive          | 6557       | 27.0           | 3.5                             | 96.4        | 119.1                                   | 28.8     | -      | -    |
| Ning[77]  | Manufacturing       | 1439       | 20-55          | 1-5                             | 77.5        | 100.0                                   | 33.6     | 5.4    | -    |
| Xu[78]    | Forging             | 272        | 33.7           | 4.2                             | -           | 129                                     | 26.1     | -      | -    |
| Liu[79]   | Manufacturing       | 3432       | 32.7±7.4       | 3.8±2.5                         | 81.2        | 92.1±4.9                                | 37.1     | 3.9    | -    |
| Peng[80]  | Automotive          | 706        | 35.5±7.6       | 11.1±7.8                        | 65.7        | 99.3                                    | 59.8     | 9.1    | -    |
| Huang[81] | Electronics         | 172        | 28.3           | 4.3                             | 66.3        | 100.0                                   | 36.0     | 15.1   | -    |
| Li[82]    | Steel pipes         | 106        | 29.8±2.4       | 7.6                             | -           | 89.6±9.7                                | 28.3     | -      | -    |
| Chen[83]  | Tires               | 953        | 37.9±8.6       | 11.8±7.1                        | 90.3        | 91.2                                    | 10.5     | -      | -    |

| Author    | Type of factory  | Population |             |                           | Male (%) | Noise level (max or mean) [dB(A)] | NIHL (%) |        |     |
|-----------|------------------|------------|-------------|---------------------------|----------|-----------------------------------|----------|--------|-----|
|           |                  | N          | Age (years) | Exposure duration (years) |          |                                   | HFNIHL   | SFNIHL | NID |
| Bao[84]   | Automotive       | 3411       | 22.4±3.0    | 4.3±3.0                   | 100.0    | 86.9                              | 15.7     | -      | -   |
| You[85]   | Textile          | 1000       | 33.1±8.0    | 11.1±8.2                  | 0.0      | 90.8±7.6                          | 42.6     | -      | -   |
| Chen[86]  | Bottled drinks   | 154        | 29.9±5.5    | 5.3±3.7                   | -        | 89.6                              | 20.8     | -      | 3.3 |
| Zhang[87] | Metal processing | 965        | 27.4±6.5    | 5.6±2.3                   | 90.6     | 88.2±3.5                          | 27.5     | -      | -   |
| Zhou[88]  | Welding          | 924        | 32.4±7.5    | 10.0±6.5                  | 94.5     | 100.7                             | 48.3     | 11.6   | -   |
| Wang[89]  | Steel rolling    | 120        | 25-55       | 2-39                      | -        | 99.3                              | 75.8     | 15.0   | -   |
| Qian[90]  | Welding          | 980        | 32.0±7.0    | 9.6±6.3                   | 91.8     | 84.1±12.7                         | 33.7     | -      | -   |
| Total     | -                | 34,656     | 32.6±8.9    | 7.9±6.3                   | 81.6     | 96.2±5.1                          | 30.9     | 8.5    | 7.1 |

dB(A), A-weighted decibels; NIHL, noise-induced hearing loss; HFNIHL, high-frequency noise-induced hearing

loss; SFNIHL, speech-frequency noise-induced hearing loss; NID, noise-induced deafness.

**Table 4** Meta-analysis of cross-sectional studies with references to NIHL among manufacturing workers

| Author   | Group    | Type of factory     | Population |             |                                 |             | Noise level (max<br>or mean)<br>[dB(A)] | NIHL (%) |        |     | HFNIHL prevalence |             |
|----------|----------|---------------------|------------|-------------|---------------------------------|-------------|-----------------------------------------|----------|--------|-----|-------------------|-------------|
|          |          |                     | N          | Age (years) | Exposure<br>duration<br>(years) | Male<br>(%) |                                         | HFNIHL   | SFNIHL | NID | OR                | 95% CI      |
| Luo[91]  | Exposure | Petrochemicals      | 908        | -           | 20.1±9.1                        | -           | 91.8                                    | 38.3     | -      | 0.6 | 4.78              | 3.04-7.53   |
|          | Control  |                     | 200        | -           | 23.3±9.0                        | -           | -                                       | 11.5     | -      | -   |                   |             |
| Pan[92]  | Exposure | Shipbuilding        | 1000       | -           | -                               | -           | 110.0                                   | 69.1     | 10.9   | -   | 7.16              | 5.87-8.73   |
|          | Control  |                     | 1000       | -           | -                               | -           | -                                       | 23.8     | 1.3    | -   |                   |             |
| Yang[93] | Exposure | Furniture           | 345        | 31.6±7.4    | 15.3±12.2                       | 75.7        | -                                       | 32.2     | -      | 0.9 | 3.95              | 2.21-7.07   |
|          | Control  |                     | 140        | 43.4±8.2    | 20.2±10.1                       | 71.4        | -                                       | 10.7     | -      | -   |                   |             |
| Yu[94]   | Exposure | Cooking             | 116        | -           | -                               | -           | 90.0                                    | 15.5     | 9.5    | -   | 4.59              | 1.50-14.05  |
|          | Control  |                     | 104        | -           | -                               | -           | -                                       | 3.8      | 4.8    | -   |                   |             |
| Zu[95]   | Exposure | Metal<br>processing | 570        | -           | 2.8±2.9                         | 59.3        | 96.6                                    | 44.0     | -      | 1.8 | 8.84              | 5.24-14.91  |
|          | Control  |                     | 208        | -           | 2.6±2.5                         | 54.3        | 71.1                                    | 8.2      | -      | -   |                   |             |
| Yuan[96] | Exposure | Forging             | 88         | 36.5±9.4    | 19.1±8.7                        | -           | 109.0                                   | 61.4     | 26.1   | -   | 13.24             | 5.87-29.86  |
|          | Control  |                     | 84         | 37.2±8.6    | 20.3±7.7                        | -           | 58.0                                    | 10.5     | 1.2    | -   |                   |             |
| Hu[97]   | Exposure | Tubes               | 123        | 32.6±3.9    | 12.2±2.5                        | -           | 109.0                                   | 68.3     | 35.5   | -   | 27.14             | 10.12-72.79 |
|          | Control  |                     | 68         | 34.6±4.5    | 13.2±3.5                        | -           | -                                       | 7.4      | -      | -   |                   |             |
| Li[98]   | Exposure | Manufacturing       | 4908       | 33.7±9.2    | -                               | 95.8        | 115.7                                   | 17.3     | 12.5   | -   | 3.83              | 2.75-5.33   |
|          | Control  |                     | 753        | 35.1±10.6   | -                               | 96.7        | -                                       | 5.2      | 3.3    | -   |                   |             |
| Wang[99] | Exposure | Gem<br>processing   | 381        | 39.4±9.1    | 10.7±5.1                        | 43.8        | 102.3                                   | 15.8     | 3.4    | -   | 5.42              | 1.29-22.79  |
|          | Control  |                     | 60         | 45.4±10.5   | 13.4±11.1                       | 35.0        | -                                       | 3.3      | 1.7    | -   |                   |             |
| Ni[100]  | Exposure | Boilers             | 105        | 42.9±8.5    | 17.6±11.9                       | 91.4        | 123.8                                   | 58.1     | 8.6    | -   | 2.05              | 1.19-3.53   |
|          | Control  |                     | 109        | 41.8±6.0    | 18.7±10.3                       | 89.0        | 82.0                                    | 40.4     | 1.8    | -   |                   |             |

| Author     | Group    | Type of factory | Population |             |                           |          | Noise level (max or mean) [dB(A)] | NIHL (%) |        |      | HFNIHL prevalence |             |
|------------|----------|-----------------|------------|-------------|---------------------------|----------|-----------------------------------|----------|--------|------|-------------------|-------------|
|            |          |                 | N          | Age (years) | Exposure duration (years) | Male (%) |                                   | HFNIHL   | SFNIHL | NID  | OR                | 95% CI      |
| Liu[101]   | Exposure | Tobacco         | 1314       | 36.7±8.0    | 17.3±9.6                  | 54.5     | 82.1                              | 22.1     | 2.4    | -    | 4.01              | 1.84-8.72   |
|            | Control  |                 | 106        | 37.3±6.7    | 18.4±6.6                  | 56.6     | 51.5                              | 6.6      | 0.9    | -    |                   |             |
| Chang[102] | Exposure | Liquefied       | 37         | 46.7±7.6    | 12.7±7.4                  | -        | 79.1±5.1                          | 56.8     | -      | -    | 48.56             | 6.01-392.64 |
|            | Control  | petroleum gas   | 38         | 38.3±5.7    | 7.3±3.1                   | -        | 55.4±4.4                          | 2.6      | -      | -    |                   |             |
| Liu[103]   | Exposure | Coal processing | 360        | 43.5±6.4    | -                         | 68.1     | -                                 | 30.8     | 12.8   | -    | 1.21              | 0.88-1.66   |
|            | Control  |                 | 378        | 42.8±6.9    | -                         | 65.9     | -                                 | 27.0     | 7.4    | -    |                   |             |
| Zhang[104] | Exposure | Electronics     | 495        | 26.3±3.6    | 5.0±3.0                   | 73.5     | 86.6±2.6                          | 30.7     | 14.9   | -    | 3.71              | 2.14-6.45   |
|            | Control  |                 | 150        | 26.5±3.7    | 5.0±3.4                   | 80.0     | -                                 | 10.7     | 1.3    | -    |                   |             |
| Chen[105]  | Exposure | Electronics     | 1012       | 44.5±6.8    | 21.5±8.3                  | 74.0     | 86.9±12.9                         | 14.3     | -      | -    | 2.26              | 1.36-3.76   |
|            | Control  |                 | 261        | 43.7±8.7    | -                         | 75.9     | 61.3±3.4                          | 6.9      | -      | -    |                   |             |
| Li[106]    | Exposure | Boilers         | 120        | 32.6±9.7    | 4.8±2.8                   | -        | 108.0                             | 59.2     | 15.0   | -    | 4.71              | 1.45-15.30  |
|            | Control  |                 | 17         | 34.1±9.6    | 4.2±2.3                   | -        | -                                 | 23.5     | 0.0    | -    |                   |             |
| Li[107]    | Exposure | Manufacturing   | 170        | 34.1±10.0   | 10.5±6.2                  | -        | 98.5                              | 24.7     | -      | -    | 3.23              | 1.62-6.42   |
|            | Control  | in general      | 130        | 35.6±8.7    | 12.1±6.9                  | -        | -                                 | 9.2      | -      | -    |                   |             |
| Yang[108]  | Exposure | Sheet metals    | 63         | 31.3±6.9    | 7.8±7.1                   | 87.3     | 125.0                             | 57.1     | -      | 27.0 | 9.70              | 4.34-21.67  |
|            | Control  | -               | 91         | 33.5±8.2    | 9.1±7.5                   | 86.8     | -                                 | 12.1     | -      | 7.7  |                   |             |
| Fu[109]    | Exposure | Chemical plants | 153        | 34.5        | 9.1                       | 71.2     | 86.8                              | 44.4     | 15.7   | -    | 5.37              | 2.28-12.64  |
|            | Control  |                 | 54         | 29.5        | 6.8                       | 55.6     | -                                 | 13.0     | 1.9    | -    |                   |             |
| Liu[110]   | Exposure | Mechanical      | 404        | 36.2        | 11.7                      | 97.3     | 106.4                             | 22.0     | -      | -    | 6.43              | 3.05-13.55  |
|            | Control  | processing      | 190        | 37.2        | 10.8                      | 67.9     | -                                 | 4.2      | -      | -    |                   |             |
| Li[111]    | Exposure | Gem             | 890        | 23.9±3.9    | 2.7±2.1                   | 96.4     | 89.2±2.8                          | 34.3     | -      | -    | 3.65              | 2.24-5.95   |
|            | Control  | processing      | 160        | 24.7±4.1    | 2.9±1.9                   | 96.9     | -                                 | 12.5     | -      | -    |                   |             |

| Author    | Group    | Type of factory | Population |             |                           |          | Noise level (max or mean) [dB(A)] | NIHL (%) |        |     | HFNIHL prevalence |             |
|-----------|----------|-----------------|------------|-------------|---------------------------|----------|-----------------------------------|----------|--------|-----|-------------------|-------------|
|           |          |                 | N          | Age (years) | Exposure duration (years) | Male (%) |                                   | HFNIHL   | SFNIHL | NID | OR                | 95% CI      |
| Wu[112]   | Exposure | Shoes           | 320        | 31.0        | 8.0                       | 0.0      | 96.0                              | 17.8     | 2.8    | -   | 30.13             | 7.28-124.64 |
|           | Control  |                 | 280        | 33.0        | 10.3                      | 0.0      | -                                 | 0.7      | 0.4    | -   |                   |             |
| Tang[113] | Exposure | Manufacturing   | 726        | 38.2±8.2    | 23.0±9.2                  | -        | 88.3±16.1                         | 12.5     | 1.8    | 3.4 | 5.08              | 2.99-8.63   |
|           | Control  |                 | 620        | 30.6±7.5    | 16.5±8.4                  | -        | -                                 | 2.7      | 0.6    | 1.1 |                   |             |
| Tang[114] | Exposure | Manufacturing   | 1200       | 22-55       | 9.3±7.1                   | 100.0    | 85.6±1.9                          | 57.5     | -      | -   | 30.86             | 22.20-42.90 |
|           | Control  |                 | 1000       | 22-55       | 9.4±7.0                   | 100.0    | 43.9±1.0                          | 4.2      | -      | -   |                   |             |
| Chen[115] | Exposure | Textile         | 294        | 22.8±5.3    | 7.2±5.2                   | 0.0      | 98.0                              | 23.5     | 3.4    | -   | 7.05              | 3.73-13.35  |
|           | Control  |                 | 288        | 23.5±6.2    | -                         | 0.0      | -                                 | 4.2      | 0.7    | -   |                   |             |
| Xie[116]  | Exposure | Paper industry  | 1717       | 31.2±4.8    | 9.5±4.7                   | 99.4     | 104.0                             | 22.6     | 12.3   | -   | 3.13              | 2.17-4.50   |
|           | Control  |                 | 410        | 35.8±6.9    | 10.2±5.8                  | 98.5     | 73.4                              | 8.5      | 4.6    | -   |                   |             |
| Lin[117]  | Exposure | Machinery       | 500        | 28.8        | -                         | 56.0     | 104.5                             | 19.8     | 2.6    | -   | 5.63              | 3.45-9.19   |
|           | Control  |                 | 500        | 27.2        | -                         | 57.6     | -                                 | 4.2      | 0.0    | -   |                   |             |
| Total     | Exposure | -               | 18,319     | 33.9±9.4    | 12.6±9.8                  | 81.4     | 102.2±7.2                         | 28.7     | 10.0   | 2.3 | 5.63              | 4.03-7.88   |
|           | Control  |                 | 7399       | 34.9±10.1   | 12.0±9.1                  | 73.4     | 63.5±3.8                          | 9.9      | 2.1    | 2.0 |                   |             |

dB(A), A-weighted decibels; NIHL, noise-induced hearing loss; HFNIHL, high-frequency noise-induced hearing loss; SFNIHL, speech-frequency noise-induced hearing loss; NID,

noise-induced deafness; OR, odds ratio; CI, confidence interval.
